# Supplementary material for: A Ti3C2Tx MXene cathode and redox-active electrolyte based flexible Zn-ion microsupercapacitor for integrated pressure sensing application
Source: Royal Society of Chemistry journal article supplement (doi:10.1039/d2nr06626b), 2022-12-21
Supplement: d2nr06626b1.pdf [file d2nr06626b1.pdf]

Electronic Supplementary Information

*For*

**Ti<sub>3</sub>C<sub>2</sub>T<sub>x</sub> MXene based Flexible Zn-ion Microsupercapacitor with Redox-Active Electrolyte for  
integrated Pressure Sensing Application**

Weijia Liu, La Li\*, and Guozhen Shen\*

*W. Liu, Dr. L. Li, Prof. G. Z. Shen*

*School of Integrated Circuits and Electronics, Beijing Institute of Technology, Beijing 100081, China, E-mail: [lali@bit.edu.cn](mailto:lali@bit.edu.cn),  
[gzshen@bit.edu.cn](mailto:gzshen@bit.edu.cn)*

\*Corresponding author:

E-mail address: [lali@bit.edu.cn](mailto:lali@bit.edu.cn), [gzshen@bit.edu.cn](mailto:gzshen@bit.edu.cn)

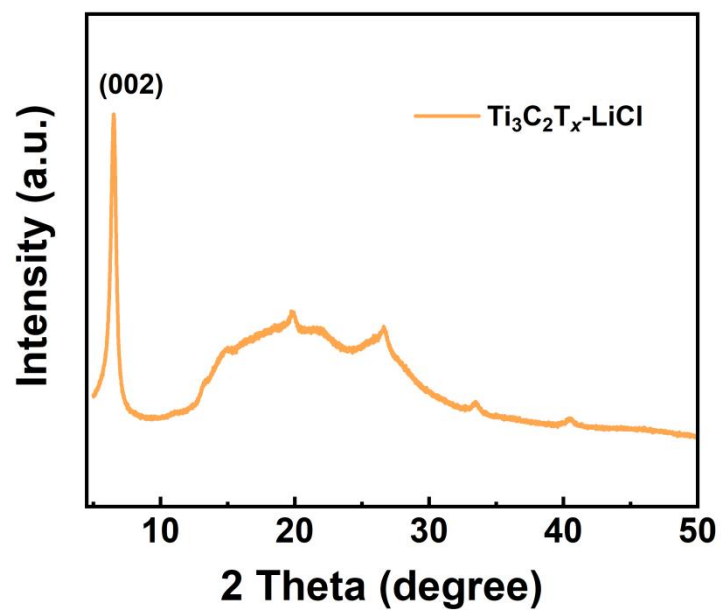

Fig. S1 The XRD patterns of the mono-layer  $\text{Ti}_3\text{C}_2\text{T}_x\text{-LiCl}$  MXene.

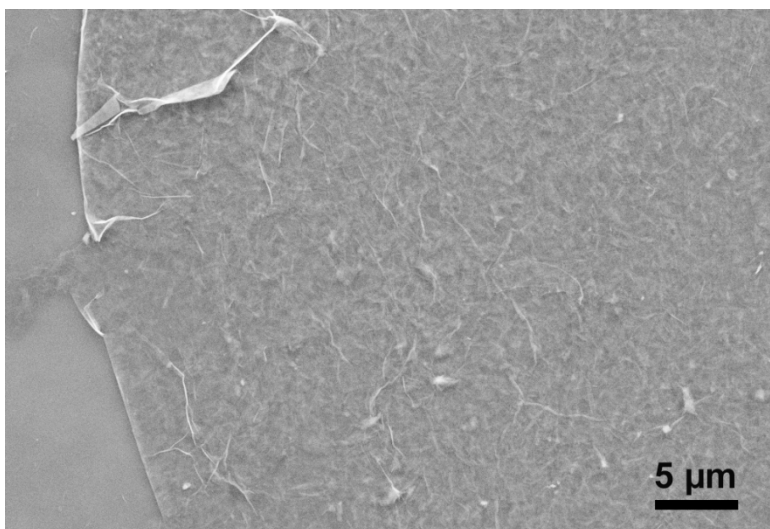

**Fig. S2** The SEM image of the mono-layer  $\text{Ti}_3\text{C}_2\text{T}_x\text{-LiCl}$  MXene.

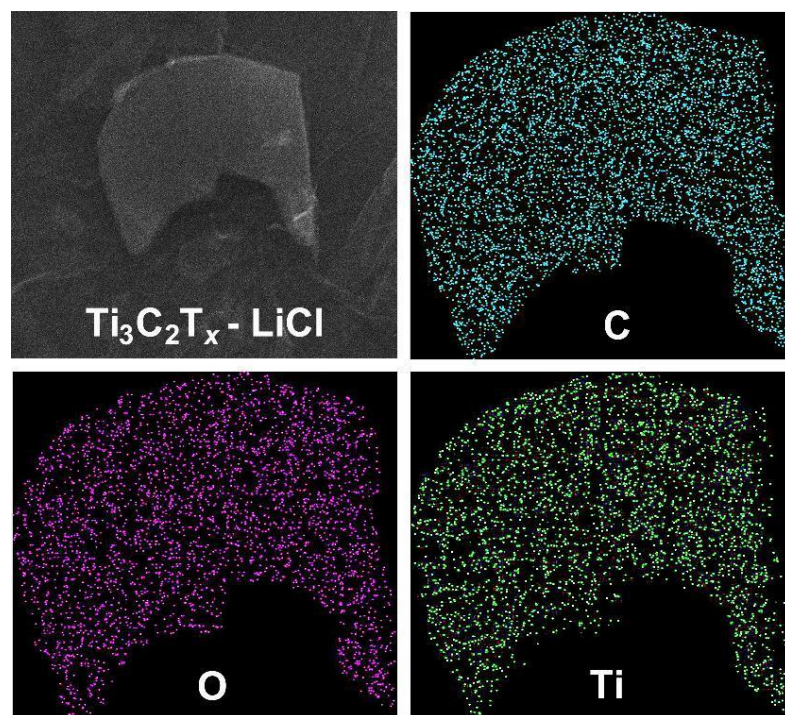

**Fig. S3** The SEM image and corresponding elemental mapping of the single  $\text{Ti}_3\text{C}_2\text{T}_x\text{-LiCl}$  MXene.

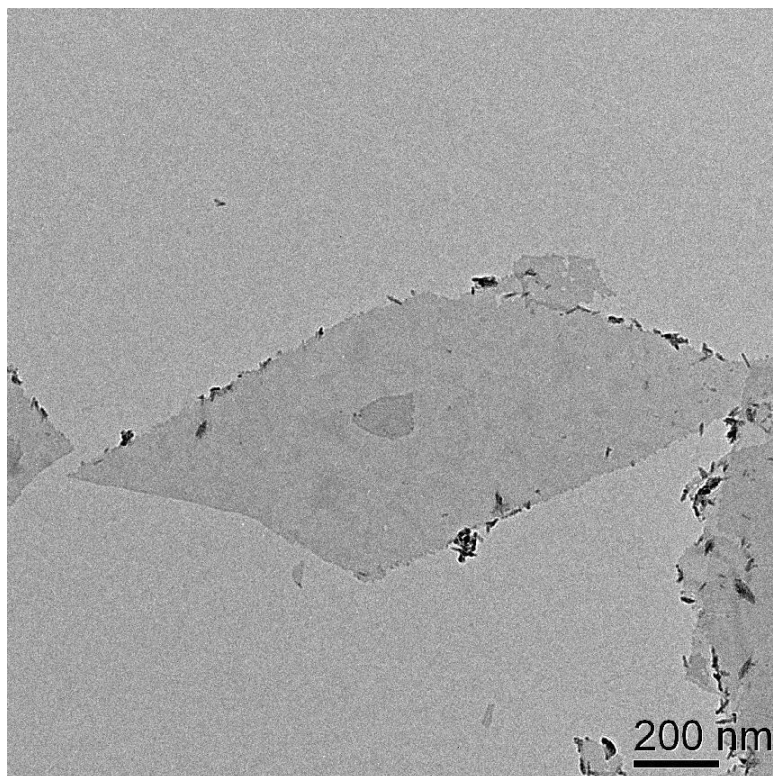

**Fig. S4** The TEM image of the single  $\text{Ti}_3\text{C}_2\text{T}_x$ -DMSO MXene.

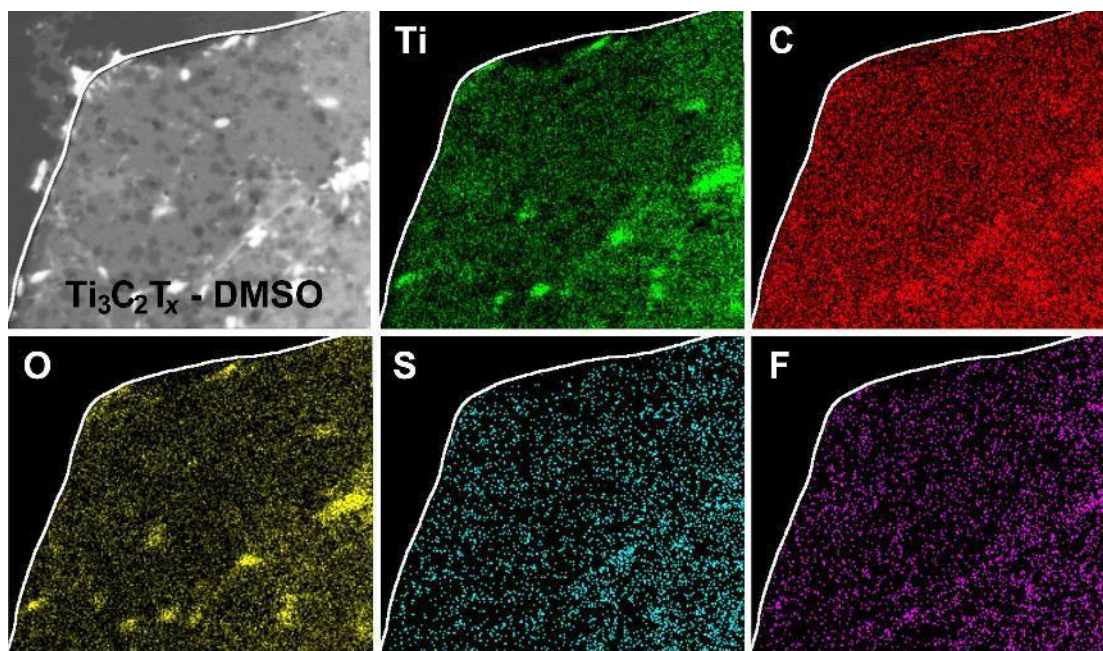

**Fig. S5** The TEM image and corresponding elemental mapping of the single  $\text{Ti}_3\text{C}_2\text{T}_x$ -LiCl MXene.

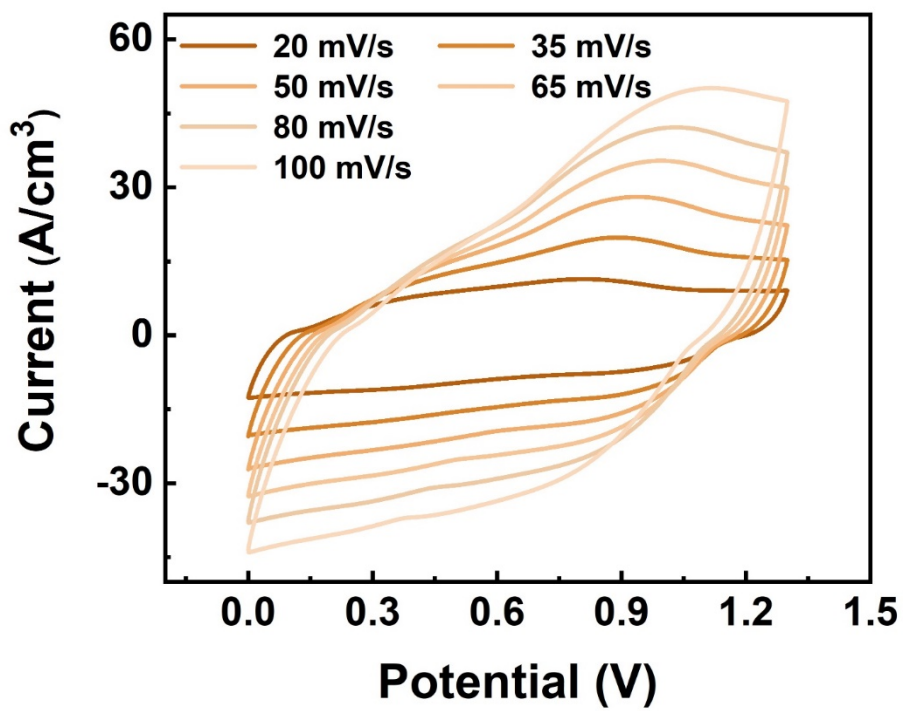

**Fig. S6** The CV curves of  $\text{Ti}_3\text{C}_2\text{T}_x$ -DMSO MXene-based Zn-ion MSC with  $\text{K}_3\text{Co}(\text{CN})_6$  additive.

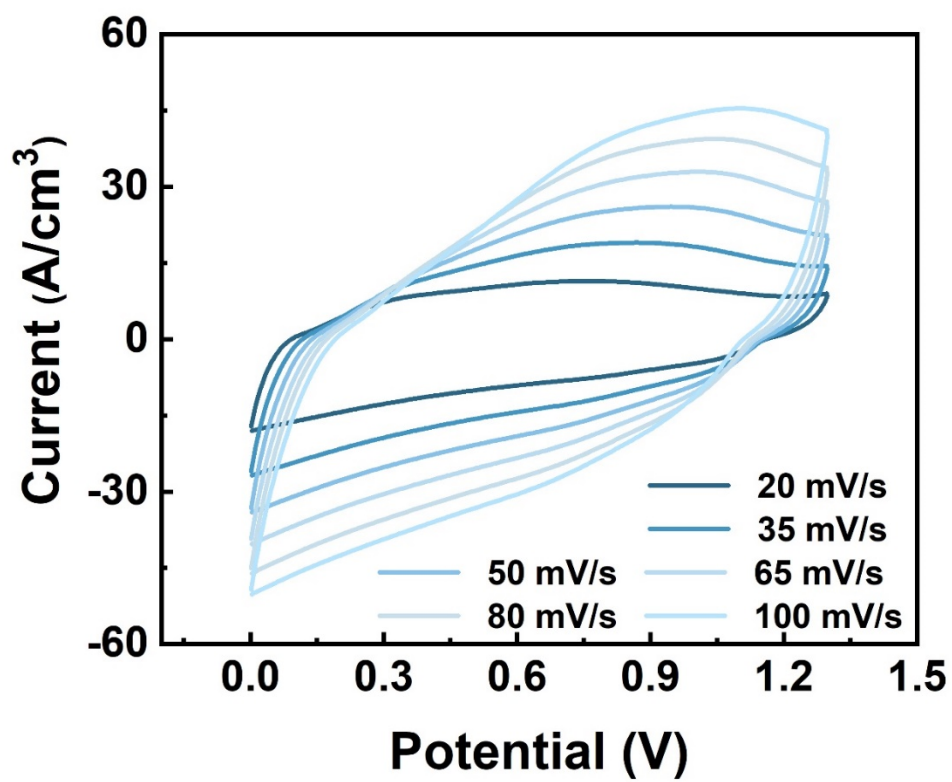

Fig. S7 The CV curves of  $\text{Ti}_3\text{C}_2\text{T}_x$ -DMSO MXene-based Zn-ion MSC without additive.



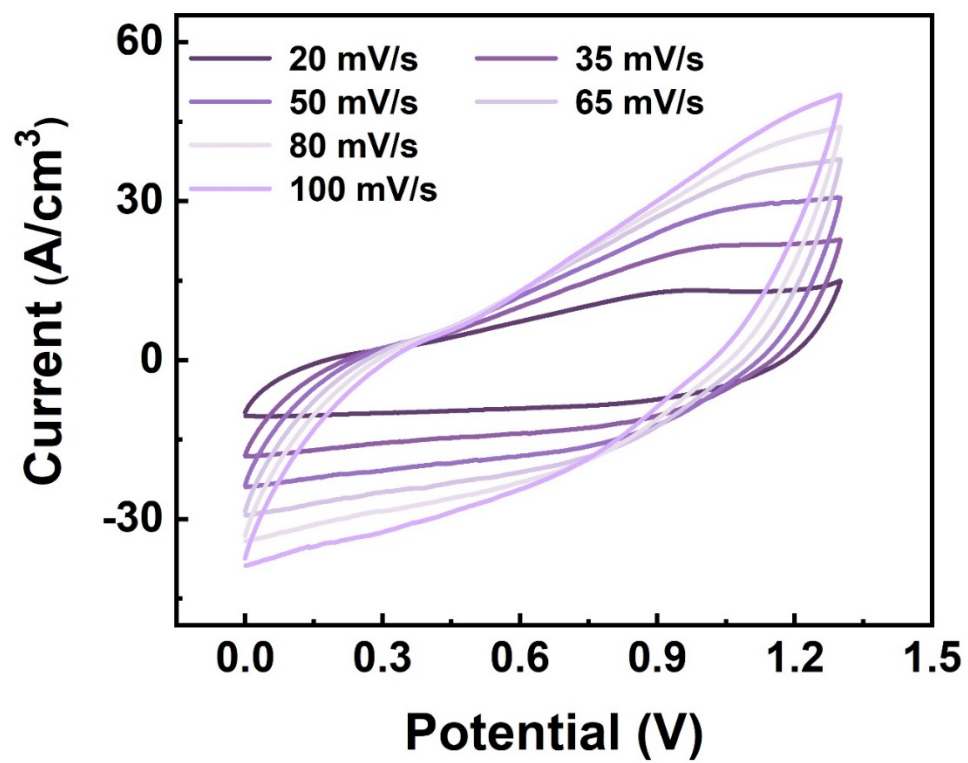

**Fig. S8** The CV curves of  $\text{Ti}_3\text{C}_2\text{T}_x$ -DMSO MXene-based Zn-ion MSC with CKNSe additive.

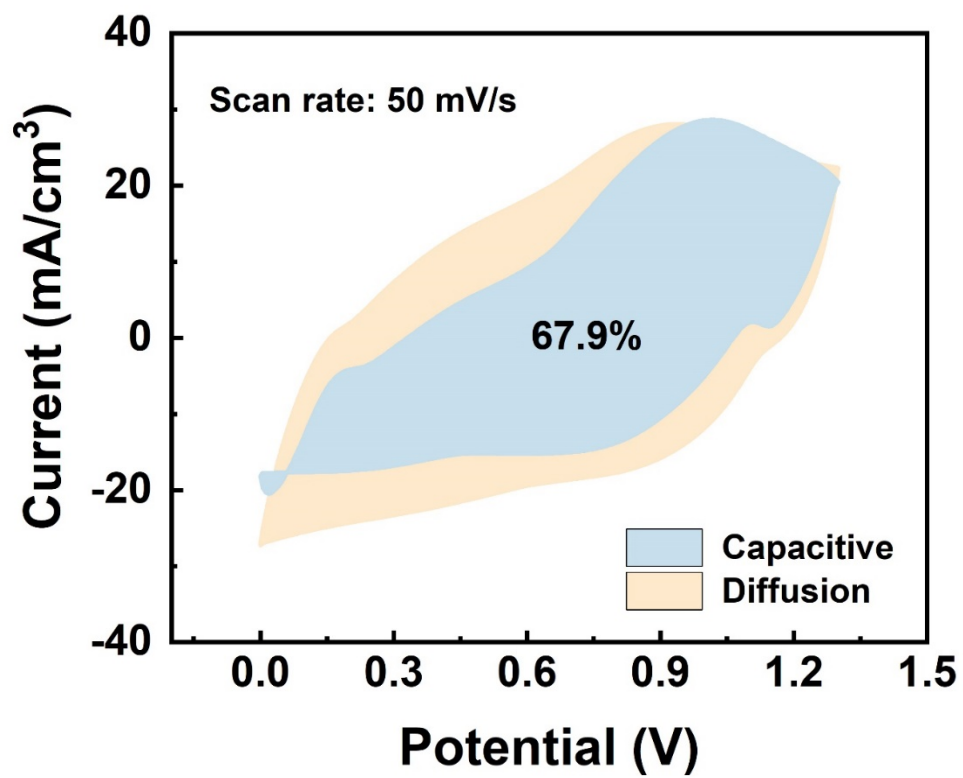

**Fig. S9** Capacitive and diffusion current of the  $\text{Ti}_3\text{C}_2\text{T}_x$ -DMSO cathodes based SC with  $\text{K}_3\text{Co}(\text{CN})_6$  additive at a scan rate of 50 mV/s.

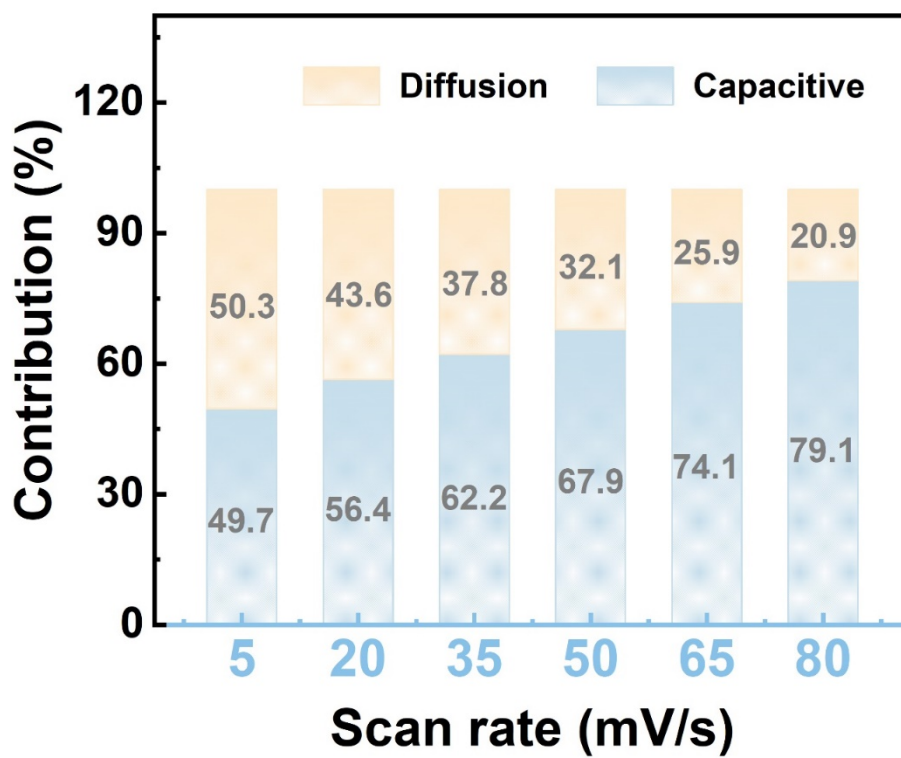

**Fig. S10** Capacitive and diffusion contribution ratio of the SC at different scan rates.

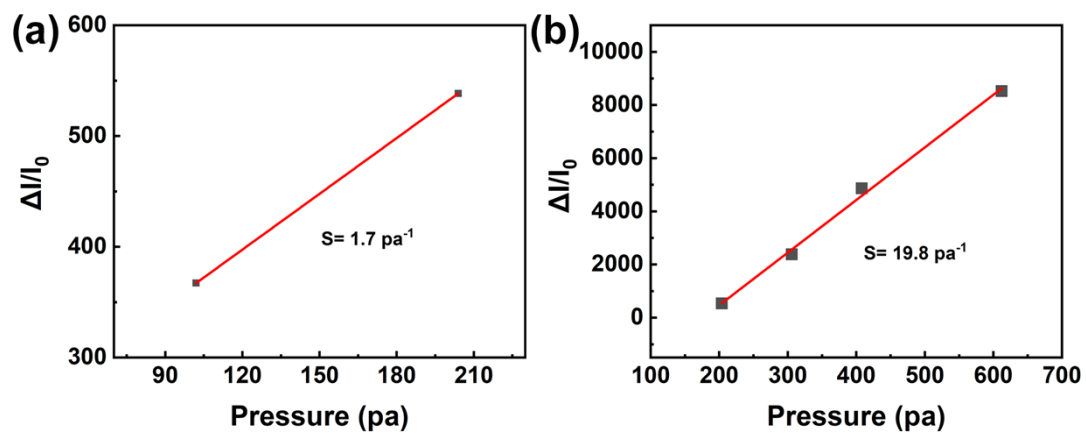

**Fig. S11** Sensitivity plots of the flexible sensors under various pressure levels ( $n = 3$  measurements).

### Calculations of the volumetric capacitance/energy density

$$\int_0^v I dv$$

$\frac{1}{SV A}$  Volumetric capacitance could be calculated by the equations:

$$C_A =$$

Where  $C_A$  represented the specific volumetric capacitance,  $I$  was current,  $S$  stood for the scan rate,  $V$  was the potential in the CV curve,  $A$  was the volume of the devices.

The energy density and power density:

$$E = C_A \times \Delta V^2 / 7200 \quad P = E \times 3600 / \Delta t$$

$E$  represented the energy density,  $P$  was the power density, and  $\Delta t$  was the total discharge time.
